# Supplementary material for: Hybrid simulation of pediatric gynecologic examination: a mix-methods study of learners’ attitudes and factors affecting learning
Source: BMC Med Educ. 2020 May 24;20:164. doi: 10.1186/s12909-020-02076-7 (PMC7245870; doi:10.1186/s12909-020-02076-7)
Supplement: Supplementary file 4 — Additional file 4. The dataset supporting the conclusions of this article. [file 12909_2020_2076_MOESM4_ESM.xlsx]

## Sheet: Pre
Sygnatura czasowa	specjalista	Numer uczestnika	Wiek	Płeć	Rok studiów/ Rok rezydentury	Ocena rozwoju cech płciowych w skali Tannera	Ocena morfologii zewnętrznych narządów płciowych u kobiety dorosłej płciowych u kobiety dorosłej	Ocena morfologii zewnętrznych narządów płciowychu nastolatki	Ocena morfologii zewnętrznych narządów płciowych i ciągłości błony dziewiczej u dziecka	Ocena morfologii i wielkości łechtaczki u dziecka	Badanie z wziernikiem kobiety dorosłej	Badanie dwuręczne kobiety dorosłej	Badanie z wziernikiem nastolatki	Badanie dwuręczne nastolatki	Badanie dwuręczne dziewczynki poniżej 12 rż	Pobranie materiału do badania cytologicznego	Pobranie materiału do badania bakteriologicznego z dróg rodnych u kobiety dorosłej	Pobranie materiału do badania bakteriologicznego z dróg rodnych u nastolatki	Pobranie materiału do badania bakteriologicznego z dróg rodnych u dziewczynki poniżej 12 rż	Wykonanie płukania pochwy u dziecka celem usunięcia ciała obcego	Zdolności komunikacyjne podczas badania nastolatki	Zdolności komunikacyjne podczas badania dziecka	Odczuwam strach w związku z koniecznością wykonania badania ginekologicznego u dziecka / nastolatki	Zdolności komunikacyjne podczas badania pacjentki dorosłej	Ogólna ocena własnych umiejętności w zakresie badania ginekologicznego: aspekty techniczne
2017-04-24 18:20:43	pediatra	1.1	29	1	4	6	3	3	1		0	0	0	0	0	0	0	0	0	0	2	2	2	2	0
2017-04-26 17:48:55	pediatra	1.3	28	1	2	7	4	4	2	2	1	1	1	1	1	1	1	1	1	1	6	7	4	7	3
2017-05-11 17:53:19	ginekolog	1.4	34	1	po studiach	3	10	6	7	3	10	10	7	7	4	10	10	10	7	2	8	7	8	10	9
2017-04-24 18:20:10	pediatra	2.1	33	1		8	0	0	0		0	0	0	0	0	0	0	0	0	0	0	0	0	0	0
2017-04-26 17:49:38	pediatra	2.3	29	1	3rezydentury	9	2	2	2	1	0	0	0	0	0	0	0	0	0	0	0	9	10	8	0
2017-04-24 18:26:12	pediatra	3.1.	31	1	IV	7	0	5	5	5	0	0	0	0	0	0	0	0	0	0	6	6	5	2	0
2017-04-25 17:41:58	ginekolog	3.2	27	1	I rok rezydentury	1	8	6	3	3	8	8	5	5	0	3	8	5	0	0	4	2	5	8	7
2017-04-26 17:49:47	ginekolog	3.3	37	1	2 rok rezydentury z ginekologii i położnictwa	4	8	5	5	4	8	6	4	3	3	8	7	6	5	6	5	5	5	5	5
2017-05-11 17:48:18	ginekolog	3.4	25	1	staz/gin	4	6	4	3	1	6	6	4	3	3	6	6	4	4	2	5	5	4	7	5
2017-04-26 17:48:47	ginekolog	4.3	31	1	4	5	9	6	2	2	9	9	2	2	0	9	9		0	0	6	0	8	7	7
2017-05-11 17:49:18	ginekolog	4.4.	30	1	V Ginekologia	5	7	5	0	0	10	8	5	5	0	10	10	10	0	0	6	5	7	10	9
2017-04-24 18:22:46	ginekolog	5.1	31	1	4	2	9	8	2		8	8	0	0	0	3	8	1	0	0	1	1	8	7	6
2017-04-26 17:46:27	ginekolog	5.3	29	1	3	6	9	9	9	8	10	10	7	7	4	10	10	9	6	8	10	8	2	9	9
2017-04-24 18:21:06	ginekolog	6.1	28	1	ginekologia i położnictwo I rok	2	9	5	0		9	8	0	0	0	1	8	0	0	0	2	2	4	9	7
2017-04-25 20:09:29	ginekolog	6.2	27	1	1	5	8	4	2	2	8	9	2	2	2	10	10	4	1	1	3	3	3	8	5
2017-04-26 17:49:32	ginekolog	6.3	28	1	Rez. 2r	4	8	5	3	3	9	8	3	3	3	6	8	4	3	2	3	2	8	8	6
				K 1
				M 2

## Sheet: post
Sygnatura czasowa	specjalista	Numer uczestnika	Wiek	Płeć	Rok studiów/ Rok rezydentury		Ocena rozwoju cech płciowych w skali Tannera	Ocena morfologii zewnętrznych narządów płciowych u kobiety dorosłej płciowych u kobiety dorosłej	Ocena morfologii zewnętrznych narządów płciowychu nastolatki	Ocena morfologii zewnętrznych narządów płciowych i ciągłości błony dziewiczej u dziecka	Ocena morfologii i wielkości łechtaczki u dziecka	Badanie z wziernikiem kobiety dorosłej	Badanie dwuręczne kobiety dorosłej	Badanie z wziernikiem nastolatki	Badanie dwuręczne nastolatki	Badanie dwuręczne dziewczynki poniżej 12 rż		Pobranie materiału do badania cytologicznego	Pobranie materiału do badania bakteriologicznego z dróg rodnych u kobiety dorosłej	Pobranie materiału do badania bakteriologicznego z dróg rodnych u nastolatki	Pobranie materiału do badania bakteriologicznego z dróg rodnych u dziewczynki poniżej 12 rż	Wykonanie płukania pochwy u dziecka celem usunięcia ciała obcego	Zdolności komunikacyjne podczas badania nastolatki	Zdolności komunikacyjne podczas badania dziecka	Odczuwam strach w związku z koniecznością wykonania badania ginekologicznego u dziecka / nastolatki	Zdolności komunikacyjne podczas badania pacjentki dorosłej	Ogólna ocena własnych umiejętności w zakresie badania ginekologicznego: aspekty techniczne
2017-04-24 20:36:59	pediatra	1.1	29	Kobieta	4		10	10	10	2	2	2	0	0	0	2		0	0	4	5	0	6	6	6	6	3
2017-04-26 21:29:16	pediatra	1.3	28	Mężczyzna	2		7	8	7	8	9	8	6	5	6	8		9	9	8	9	6	8	8	6	7	7
2017-05-16 08:46:56	ginekolog	1.4	34	Kobieta	po rezydenturze		4	10	7	5	3	10	10	7	7	4		10	10	8	6	2	8	7	6	10
2017-04-26 21:29:54	pediatra	2.3	29	Kobieta	3		4	4	4	4	4	0	0	0	0	0		0	4	4	4	4	9	9	4	9	3
2017-04-24 20:39:17	pediatra	3.1.	31	Kobieta	IV		8	5	7	5	3	0	0	0	0	2		0	5	5	5	2	8	8	5	2	1
2017-04-25 20:09:21	pediatra	3.2	27	Kobieta	I rok rezydentury		3	8	7	7	6	8	8	5	7	3		3	8	7	7	5	6	6	7	8	7
2017-04-26 21:30:36	ginekolog	3.3	38	Kobieta	2 rok rezydentury z gin. i położnictwa		7	8	8	9	8	9	9	7	7	6		7	9	9	9	8	8	8	7	9	9
2017-05-11 20:29:28	ginekolog	3.4	25	Kobieta	staż/ginekologia		6	6	5	5	3	6	6	5	5	5		6	6	5	5	5	7	6	3	7	6
2017-04-24 20:46:14	ginekolog	4.1.	28	Kobieta	lekarz rezydent		8	8	8	5	3	2	2	2	2	2		8	8	8	7	6	8	8	8	6	5
2017-04-26 21:33:18	ginekolog	4.3	31	Kobieta	4		5	9	7	4	2	9	9	5	7	6		9	9	6	6	5	5	3	8	7	8
2017-05-11 20:37:57	ginekolog	4.4.	30	Mężczyzna	V Ginekologia		6	10	8	7	3	10	9	10	8	6		10	10	10	7	7	9	8	2	10	9
2017-04-24 20:43:02	ginekolog	5.1	31	Kobieta	4		2	8	7	4	3	9	9	3	3	0		2	9	5	5	3	3	2	6	9	7
2017-04-26 21:29:35	ginekolog	5.3	29	Kobieta	3		8	10	10	9	9	10	10	9	9	8		10	10	10	9	10	10	9	1	10	9
2017-04-24 20:37:08	ginekolog	6.1	28	Kobieta	ginekologia i położnictwo I rok		5	8	5	5	3	8	7	2	3	3		4	6	7	7	3	4	3	5	6	5
2017-04-25 20:12:08	ginekolog	6.2	27	Kobieta	1		9	8	7	7	7	8	8	7	7	6		10	10	9	9	9	8	8	7	9	7
2017-04-26 21:37:48	ginekolog	6.3	28	Mężczyzna	Rez 2 rok		6	8	6	7	6	8	8	5	7	6		6	8	7	7	7	7	7	5	8	6

## Sheet: Attitudes
Sygnatura czasowa	specjalista	Numer	Wiek	Płeć	Rok rezydentury / Rok studiów	Czy brałeś już udział w zajęciach z udziałem symulowanego pacjenta?	Czy brałeś już udział w zajęciach z udziałem trenażera?	Czy słyszałeś już wcześniej o nauczaniu z udziałem symulowanych pacjentów?	Czy wcześniej wykonywałeś badanie ginekologiczne u nastolatki?	Czy wcześniej wykonywałeś badanie ginekologiczne u dziecka?	Ćwicząc z trenażerem, a nie z hybrydowym modelem (symulowany pacjent + trenażer), łatwiej mi było sobie wyobrazić, że mam do czynienia z prawdziwym pacjentem.	7. Wolę ćwiczyć badanie wykorzystując hybrydowy model, niż tylko trenażer.	8. Rozpoczynając scenariusz większy stres odczuwałem w przypadku modelu hybrydowego.	9. Wobec modelu hybrydowego zachowywałem się podobnie jak zachowywałem się wcześniej wobec prawdziwych pacjentów.	10. Więcej hipotez przychodziło mi do głowy w trakcie scenariusza z modelem hybrydowym.	11. Ćwicząc z modelem hybrydowym, a nie z trenażerem, myślałem o nim jak o prawdziwym pacjencie.	12. Łatwiej było mi ćwiczyć umiejętności komunikacyjne (werbalne i niewerbalne) w przypadku modelu hybrydowego.	13. Uważam, że na dzisiejszych zajęciach więcej nauczyłem się ćwicząc na trenażerze w porównaniu z modelem hybrydowym.	14. Myślę, że trenażer bardziej realnie odwzorowuje badanie prawdziwego pacjenta w porównaniu z modelem hybrydowym.	15. Łatwiej mi było ćwiczyć badanie na trenażerze niż na modelu hybrydowym.	16. Wobec trenażera odczuwałem emocje podobne do tych, które miałem wobec prawdziwych pacjentów.	17. Wolę ćwiczyć badanie z wykorzystaniem trenażera niż modelu hybrydowego.	18. Łatwiej było mi inicjować komunikację werbalną z rodzicem w przypadku modelu hybrydowego niż trenażera.	19. Myślę, że model hybrydowy bardziej realnie odwzorowuje badanie prawdziwego pacjenta w porównaniu z trenażerem.	20. Ćwicząc z modelem hybrydowym, a nie z samym trenażerem łatwiej mi było sobie wyobrazić, że mam do czynienia z prawdziwym pacjentem.	21. Kiedy ćwiczyłem z trenażerem, a nie z modelem hybrydowym, troszczyłem się o niego jak o prawdziwego pacjenta.	22. Wobec trenażera zachowywałem się podobnie jak zachowywałem się wcześniej wobec prawdziwych pacjentów.	23. Łatwiej było mi ćwiczyć umiejętności komunikacyjne (werbalne i niewerbalne) w scenariuszu z trenażerem.	24. Łatwiej mi było ćwiczyć badanie na modelu hybrydowym niż na trenażerze.	25. Więcej hipotez przychodziło mi do głowy w trakcie scenariusza z trenażerem.	26. Wobec modelu hybrydowego odczuwałem emocje podobne do tych, które miałem wobec prawdziwych pacjentów.	27. Łatwiej mi było wyobrazić sobie jak może czuć się ten pacjent, gdy miałem do czynienia z modelem hybrydowym a nie trenażerem.	28. Łatwiej było mi inicjować komunikację werbalną z rodzicem w przypadku trenażera niż modelu hybrydowego.	29. Kiedy ćwiczyłem z modelem hybrydowym, a nie z trenażerem, troszczyłem się o niego jak o prawdziwego pacjenta.	30. Uważam, że na dzisiejszych zajęciach więcej nauczyłem się ćwicząc z modelem hybrydowym.	31. Odczuwałem większą empatię w stosunku do trenażera niż modelu hybrydowego.	32. Ćwicząc z trenażerem, a nie z modelem hybrydowym myślałem o nim jak o prawdziwym pacjencie.	33. Odczuwałem większą empatię w stosunku do modelu hybrydowego niż do trenażera	34. Łatwiej mi było wyobrazić sobie jak może czuć się ten pacjent, gdy miałem do czynienia z trenażerem, a nie z modelem hybrydowym.	35. Rozpoczynając scenariusz większy stres odczuwałem w przypadku trenażera.	36. Zajęcia z trenażerem lepiej przygotowały mnie do wykonania badania w przypadku prawdziwego pacjenta w porównaniu z modelem hybrydowym	37. Zajęcia z modelem hybrydowym lepiej przygotowały mnie do wykonania badania w przypadku prawdziwego pacjenta w porównaniu z trenażerem	Po ćwiczeniu badania na trenażerze czuję się bardziej pewny siebie odnośnie wykonania tej procedury	38. Po ćwiczeniu badania na trenażerze czuję się bardziej pewny siebie odnośnie wykonania tej procedury w porównaniu z modelem hybrydowym	39. Po ćwiczeniu badania na modelu hybrydowym czuję się bardziej pewny siebie odnośnie wykonania tej procedury w porównaniu z trenażerem.	40. Czy poleciłbyś zajęcia z wykorzystaniem modelu hybrydowego innym uczącym się?	41. Jak według Ciebie powinna przebiega edukacja praktyczna w zakresie badania ginekologicznego u dziecka/nastolatki? Proszę wybrać jedną z podanych odpowiedzi:	specjalista	Co dał Ci udział w zajęciach z wykorzystaniem modelu hybrydowego?
2017-04-24 20:47:17	pediatra	1.1	29	Kobieta	4	Nie	Nie	Nie	Nie	Nie	1	3	4	3	3	3	3	3	2	2	2	2	2	3	3	3	3	2	3	2	3	3	3	3	3	2	2	2	3	2	2	3	2	3	3	Tak	C) najpierw trenażer, następnie model hybrydowy, następnie prawdziwy pacjent	pediatra	Pozwolił na poćwiczyć umiejętności komunikacji.
2017-04-26 21:37:03	pediatra	1.3	28	Mężczyzna	2	Tak	Tak	Tak	Nie	Nie	1	4	2	3	3	3	4	1	1	2	2	2	3	3	3	3	2	1	3	3	3	3	2	3	4	1	2	3	2	3	2	3	3	2	3	Tak	C) najpierw trenażer, następnie model hybrydowy, następnie prawdziwy pacjent	pediatra	Większą pewność w komunikacji i badaniu ginekologicznym
2017-05-16 08:52:21	ginekolog	1.4	34	Kobieta	6 (po specjalizacji)	Nie	Nie	Tak	Tak	Tak	4	4	2	3	2	4	4	1	1	1	2	1	3	4	4	3	3	2	4	2	3	4	2	4	4	2	3	3	2	4	1	4		1	4	Nie	C) najpierw trenażer, następnie model hybrydowy, następnie prawdziwy pacjent	ginekolog	możliwość oceny własnych umiejetności w sytuacji praktycznej. Ocena mojego podejścia do pacjenta
2017-04-26 21:40:45	pediatra	2.3	29	Kobieta	3	Nie	Tak	Tak	Nie	Nie	1	4	2	4	4	4	4	1	1	1	1	1	4	4	4	3	3	1	4	1	4	4	1	4	4	1	1	4	1	2	1	4	2	2	4	Tak	C) najpierw trenażer, następnie model hybrydowy, następnie prawdziwy pacjent	pediatra	Możliwość przygotowania się do badania ginekologicznej małoletniej pacjentki
2017-04-24 20:50:17	pediatra	3.1.	31	Kobieta	4	Nie	Nie	Tak	Nie	Nie	2	1	4	4	3	3	3	3	2	4	3	4	3	3	3	2	2	2	2	2	3	3	2	3	2	1	1	3	2	2	3	2	3	3	2	Tak	C) najpierw trenażer, następnie model hybrydowy, następnie prawdziwy pacjent	pediatra
2017-04-25 20:18:54	pediatra	3.2	27	Kobieta	1	Nie	Tak	Nie	Tak	Nie	1	4	4	4	4	4	4	1	1	1	1	1	2	4	4	1	1	1	2	1	4	4	3	4	4	1	1	4	1	1	2	4	4	2	3	Tak	C) najpierw trenażer, następnie model hybrydowy, następnie prawdziwy pacjent	pediatra	Pozwolił mi przećwiczyć komunikację z pacjentką oraz jednocześnie samą technikę badania.
2017-04-26 21:45:19	ginekolog	3.3	38	Kobieta	2	Tak	Tak	Tak	Nie	Nie	3	4	4	3	3	4	3	4	3	2	2	2	4	4	4	4	4	4	3		3	4	1	4	4	3	1	4	2	3	2	4	4	2	4	Tak	B) najpierw model hybrydowy, następnie prawdziwy pacjent	ginekolog	Bardziej całościowe pojęcie :-)
2017-05-11 20:37:17	ginekolog	3.4	25	Kobieta	1 (staż)	Tak	Tak	Tak	Nie	Nie	2	4	1	2	2	4	3	2	1	2	3	1	3	4	3	4	3	2	4	2	4	3	2	3	3	2	3	3	2	2	2	3	3	2	3	Tak	C) najpierw trenażer, następnie model hybrydowy, następnie prawdziwy pacjent	ginekolog	wyobrażenie o tym , czego moge spodziewac się w gabinecie podczas wizyty. Przekrój zachowań zarówno pacjenta jak i rodzica.
2017-04-24 20:53:33	ginekolog	4.1.	28	Kobieta	2	Nie	Nie	Tak	Nie	Nie	2	4	2	3	3	3	3	2	2	2	2	2	3	3	3	3	3	2	2	2	3	3	2	3	3	2	3	2	2	2	2	3	3	2	2	Tak	C) najpierw trenażer, następnie model hybrydowy, następnie prawdziwy pacjent	ginekolog	Umiejetnosc rozmowy z pacjentem oraz wykonania technicznie badania
2017-04-26 21:43:16	ginekolog	4.3	31	Kobieta	4	Nie	Nie	Tak	Nie	Nie	1	3	3	2	3	3	3	2	2	3	2	2	2	3	3	2	2	2	3	2	3		2	3	3	2	2	3	2		2	3	3	2	3	Tak	C) najpierw trenażer, następnie model hybrydowy, następnie prawdziwy pacjent	ginekolog	możliwość wyobrażenia sobie realnej sytuacji
2017-05-11 20:50:26	ginekolog	4.4.	30	Mężczyzna	5	Nie	Tak	Tak	Tak	Nie	1	4	4	4	2	4	4	2	1	3	1	2	1	4	4	2	4	2	2	2	4	4	1	2	3	1	1	4	2	2	2	3	3	2	3	Tak	A) najpierw trenażer, następnie prawdziwy pacjent	ginekolog	Nowe doświadczenie
2017-04-24 20:48:46	ginekolog	5.1	31	Kobieta	4	Tak	Tak	Tak	Nie	Nie	1	4	2	3	3	4	4	2	2	1	1	1	4	4	4	1	2	2	4	2	4	4	1	4	4	1	1	4	1	3	2	3	3	2	3	Tak	C) najpierw trenażer, następnie model hybrydowy, następnie prawdziwy pacjent	ginekolog	możliwość komunikacji i nawiązania więzi z pacjentem
2017-04-26 21:38:51	ginekolog	5.3	29	Kobieta	3	Tak	Nie	Tak	Nie	Nie	3	4	4	3	3	3	4	2	2	2	2	1	2	4	4	2	3	2	4	2	3	4	2	3	4	2	2	4	2	2	2	3	3	2	3	Tak	C) najpierw trenażer, następnie model hybrydowy, następnie prawdziwy pacjent	ginekolog	Nauczenie obycia z pacjentem pediatrycznym oraz obycie z badaniem gin u dzieci.
2017-04-24 20:46:20	ginekolog	6.1	28	Kobieta	1	Tak	Tak	Tak	Nie	Nie	1	4	3	4	4	4	4	1	1	2	1	1	4	4	4	2	1	1	2	1	4	4	1	4	4	1	1	3	1	4	2	3	2	2	3	Tak	C) najpierw trenażer, następnie model hybrydowy, następnie prawdziwy pacjent	ginekolog	łatwiej było mi wejść w rolę
2017-04-25 20:19:14	ginekolog	6.2	27	Kobieta	1	Nie	Tak	Tak	Nie	Nie	1	4	3	4	4	4	4	1	1	2	1	1	3	4	4	2	2	1	3	1	4	4	2	4	4	1	2	4	2	3	2	4	3	2	4	Tak	B) najpierw model hybrydowy, następnie prawdziwy pacjent	ginekolog	Możliwość wyobrażenia sobie, że mam doczynienia z prawdziwą pacjentką. Wczucie się w sytuację pacjentki.
2017-04-26 21:43:29	ginekolog	6.3	28	Mężczyzna	2	Nie	Nie	Tak	Tak	Nie	4	4	4	4	4	4	4	1	1	1	1	1	4	4	4	1	3	1	4	1	4	4	1	4	4	1	1	4	1	1	1	4	1	1	4	Tak	C) najpierw trenażer, następnie model hybrydowy, następnie prawdziwy pacjent	ginekolog	Większą swobodę w komunikacji i inicjacji badania ginekologicznego u małoletniej pacjentki
[truncated: 1 more columns]
